# Supplementary material for: Innovative wound management: creating dynamic Alg-Mg/SF hydrogels for controlled Mg2+ release in wound healing
Source: Royal Society of Chemistry journal article supplement (doi:10.1039/d4ra00793j), 2024-01-01
Supplement: d4ra00793j1.pdf [file d4ra00793j1.pdf]

## Supporting information

### **Innovative Wound Management: Creating dynamic Alg-Mg/SF Hydrogels for Controlled Mg<sup>2+</sup> Release in Wound Healing**

**Authors:** Chaolun Dai <sup>1, 2, †</sup>, Binxin Wu <sup>3, †</sup>, Min Chen <sup>2</sup>, Yisheng Gao <sup>1</sup>, Miao Zhang <sup>1</sup>,  
Wanhua Li <sup>1</sup>, Guicai Li <sup>1</sup>, Qinzhi Xiao <sup>2, 4, \*</sup>, Yahong Zhao <sup>1, \*</sup>, Yumin Yang <sup>1, \*</sup>

**Affiliations:** 1 Key Laboratory of Neuroregeneration of Jiangsu and Ministry of Education, Co-innovation Center of Neuroregeneration, NMPA Key Laboratory for Research and Evaluation of Tissue Engineering Technology Products, Nantong University, Nantong 226001, P. R. China.

2 Medical School, Nantong University, Nantong 226001, P. R. China.

3 Department of Echocardiography Centre, Affiliated Hospital of Nantong University, 226001, Nantong, P. R. China.

4 Department of Pediatrics, Affiliated Hospital of Nantong University, 226001, Nantong, P. R. China.

† The authors contributed equally to this work.

\* [xlun2004@126.com](mailto:xlun2004@126.com) (Q. Xiao)

\* [zhaoyh108@ntu.edu.cn](mailto:zhaoyh108@ntu.edu.cn) (Y. Zhao)

\* [yangym@ntu.edu.cn](mailto:yangym@ntu.edu.cn) (Y. Yang)

|           | Alg-BP<br>(%) | SF (SF-GSH: SF-MA=1:1)<br>(%) | MgCl <sub>2</sub><br>(mM) | CaSO <sub>4</sub><br>(mM) |
|-----------|---------------|-------------------------------|---------------------------|---------------------------|
| Alg       | 2             | -                             | -                         | 7.5                       |
| Alg-Mg    | 2             | -                             | 200                       | 7.5                       |
| Alg/SF    | 2             | 10                            | -                         | 7.5                       |
| Alg-Mg/SF | 2             | 10                            | 200                       | 7.5                       |

Table S1. Fabrication of the adaptable hydrogels.

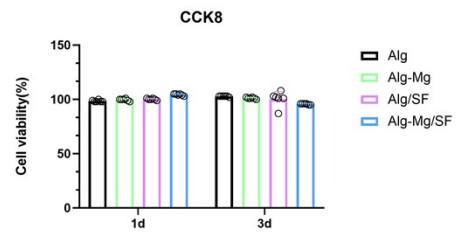

Figure S1. Survival rate of hydrogel L929 cells in each group (n=6).

**A**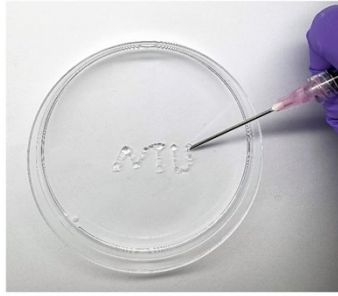**B**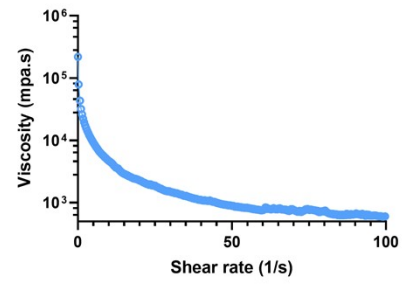

Figure S2. (A) Injectability of Alg-Mg/SF hydrogels. (B) Viscosities of the Alg-Mg hydrogel with the shear rate ranged from 0.1 to 100 1/s.
